# Supplementary material for: Insights into Gene Regulation under Temozolomide-Promoted Cellular Dormancy and Its Connection to Stemness in Human Glioblastoma
Source: MDPI journal article supplement (doi:10.3390/cells12111491), 2023-05-27
Supplement: s1 [file s1]

**Supplementary Table 1:** TaqMan primer probes (Applied Biosystems, Waltham, MA, USA) used.

| Gene                                                             | Primer          |
|------------------------------------------------------------------|-----------------|
| ACKR4 $\triangle$<br>Chemokine (C-C Motif) Receptor-Like (CCRL)1 | Hs00664347_s1   |
| Schlafen (SLFN)13                                                | Hs0111494903_m1 |
| Sloan-Kettering Institute (SKI)                                  | Hs01057032_m1   |
| Cdk5 and Abl Enzyme Substrate (Cables)1                          | Hs00292828_m1   |
| Dachsous Cadherin-Related (DCHS)1                                | Hs01044548_m1   |
| Glycerinaldehyde 3-phosphate dehydrogenase (GAPDH)               | Hs99999905_m1   |
| Octamer binding transcription factor (OCT)4                      | Hs00999632_g1   |
| Sex determining region Y-box (Sox)2                              | Hs00602736_s1   |
| Krueppel-like factor (KLF)4                                      | Hs00358835_m1   |
