# Supplementary material for: Insights into Gene Regulation under Temozolomide-Promoted Cellular Dormancy and Its Connection to Stemness in Human Glioblastoma
Source: MDPI journal article supplement (doi:10.3390/cells12111491), 2023-05-27
Supplement: s1 [file s1]

**Supplementary Table 2:** Primary antibodies used for immunofluorescence staining.

| <b>Antibody</b>                           | <b>Dilution</b> | <b>catalog no.</b> | <b>company</b>                             |
|-------------------------------------------|-----------------|--------------------|--------------------------------------------|
| Rabbit anti-CCR11<br>( $\triangle$ CCRL1) | 1:500           | #PA5-106552        | Invitrogen, Carlsbad, CA, USA)             |
| Rabbit anti-SLFN13                        | 1:400           | #PA5-54599         | Invitrogen, Carlsbad, CA, USA)             |
| Rabbit anti-SKI                           | 1:800           | #PA5-66852         | Invitrogen, Carlsbad, CA, USA)             |
| Mouse anti-Cables1                        | 1:50            | H00091768-B01P     | Abnova, Taipei City, Taiwan                |
| Rabbit anti-CDH10 ( $\triangle$ DCHS1)    | 1:750           | #PA5-101291        | Invitrogen, Carlsbad, CA, USA)             |
| Mouse anti-vWF                            | 1:1000          | sc-53465           | Santa Cruz, Dallas, TX, USA                |
| Mouse anti-CD11b                          | 1:250           | sc-1186            | Santa Cruz, Dallas, TX, USA                |
| Mouse anti-GFAP                           | 1:500           | MAB3402            | Merck Millipore, Burlington, MA, USA       |
| Rabbit anti-OCT4                          | 1:150           | #2750              | Cell Signaling, Danvers, MA, USA           |
| Rabbit anti-Sox2                          | 1:200           | sc-20088           | Santa Cruz, Dallas, TX, USA                |
| Mouse anti-KLF4                           | 1:250           | MA5-15672          | Thermo Fisher Scientific, Waltham, MA, USA |
